# Supplementary material
Source: Research Square preprint supplement (doi:10.21203/rs.3.rs-8948144/v1)
Supplement: Supplementary file 1 [file b18f605fec352b4442a8f631.docx]

**Table 1**: Demographic and clinical information of the cohorts included in this study.

|  | | |  | TCGA (n=406) | GSE157010 (n=235) |
| --- | --- | --- | --- | --- | --- |
| Sex | | | |  |  |
|  | Male | | | 297 (73.1%) | 153 (60.5%) |
|  | Female | | | 109 (26.9%) | 82 (39.5%) |
| Age | | | |  |  |
|  | Median | | | 69 | 68 |
|  | Range | | | 39-90 | 46-89 |
| Pathologic stage | | | |  |  |
|  | | Stage I-IB | | 244 (60.0%) | not available |
|  | | Stage II-IIB | | 162 (40.0%) | not available |
| T stage | | | |  |  |
|  | | T1 | | not available | 63 (26.8%) |
|  | | T2 | | not available | 139 (59.1%) |
|  | | T3 | | not available | 31 (13.2%) |
|  | | NA | | not available | 2 (0.9%) |
| Follow up | | | |  |  |
|  | | Alive | | 241 (59.4%) | 119 (50.6%) |
|  | | Death | | 165 (46.6%) | 116 (49.4%) |
|  | | 5-years survival rate | | 45/406 | 97/235 |
|  | | Mean follow up time | | 33 | 46 |
