# Supplementary material
Source: Research Square preprint supplement (doi:10.21203/rs.3.rs-8948144/v1)

**Supplement Table 1:** Primer sequences for qPCR assays

|  | | | |
| --- | --- | --- | --- |
| Gene name | Forward (5′-3′) | Reverse (5′-3′) |  |
| Actin | CTACCTCATGAAGATCCTCCGA | TTCTCCTTAATGTCACGCACGATT |  |
| C1QTNF1 | AAGTTCTACTGCTACGTGCCC | TGTGCAGGTAGGTCTCCTTCT- |  |
| GFPT2 | AGGATCCTTGCTTCGCCAAA | GTATAATGGGG CGACCCTGG |  |
| FSTL3 | ACTGCGTGGTGTGTCGAG | TGGCACGAGGAGATGTAGGT |  |
| PLXNA4 | ATCTCCGTCTCTCAGTACAA | GTGATAGGCTTGATCACCTC |  |

**Supplementary figure 1:** CAF infiltration and stromal score are associated with OS in stage I and II LUSC patients; data extracted from the TCGA-LUSC cohort (n=406). **A**, survival analysis based on the stromal scores calculated using the ESTIMATE software; **B** and **C**, Survival analysis based on the extent of CAF infiltration calculated using two different methods (MCP_Counter and xCell, respectively).
**LUSC**, Lung Squamous Cell Carcinoma; **CAF**, Cancer-associated Fibroblast;


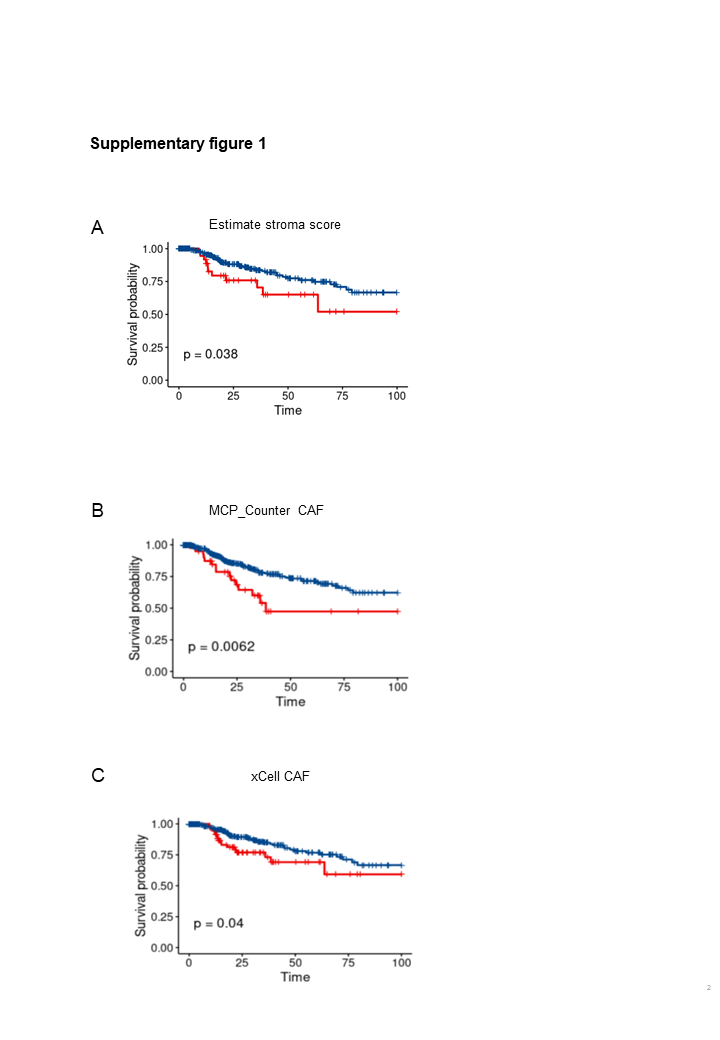


**Supplementary figure 2**: Co-expression network constructed by WGCNA. **A**, a soft-thresholding power (β) of 3 was selected based on the scale-free topology criterion; **B**, Genes with similar expression patterns were clustered into the same co-expression module in clustering dendrograms.

**WGCNA**, Weighted Gene Co-Expression Analysis;


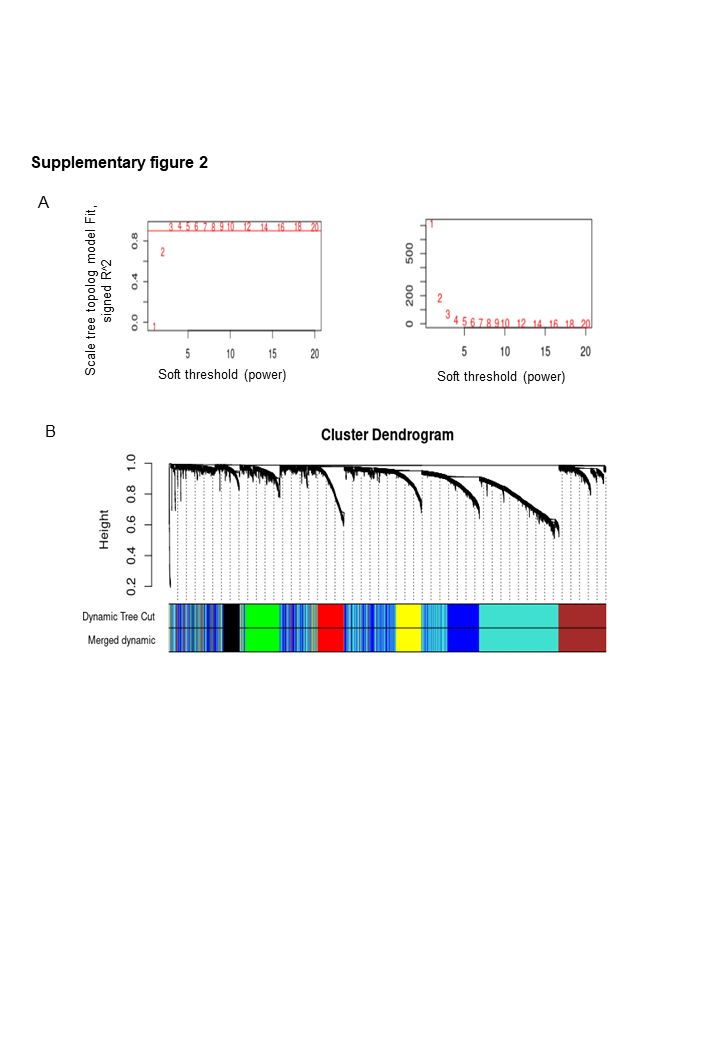


**Supplementary figure 3**: LASSO Cox regression analysis.


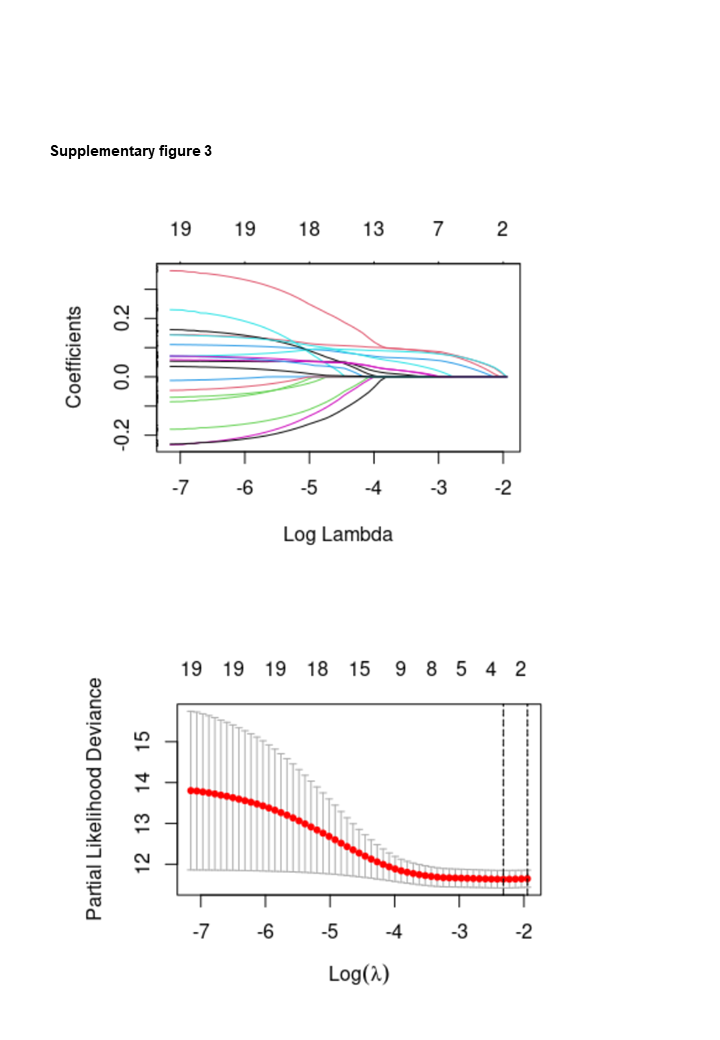

Supplement: Supplementary file 2 [file d147803182adf930b7b8353c.docx]
